# Supplementary material for: Differences in the Conformational Energy Landscape of CDK1 and CDK2 Suggest a Mechanism for Achieving Selective CDK Inhibition
Source: PubMed Central journal article supplement (PMC6344228; doi:10.1016/j.chembiol.2018.10.015), 2019-01-17
Supplement: mmc1.pdf [file mmc1.pdf]

**Cell Chemical Biology, Volume 26**

**Supplemental Information**

**Differences in the Conformational Energy Landscape  
of CDK1 and CDK2 Suggest a Mechanism  
for Achieving Selective CDK Inhibition**

**Daniel J. Wood, Svitlana Korolchuk, Natalie J. Tatum, Lan-Zhen Wang, Jane A. Endicott, Martin E.M. Noble, and Mathew P. Martin**

1 **Supplementary Information for**

2

3 **Differences in the conformational energy landscape of CDK1 and**  
4 **CDK2 suggest a mechanism for achieving selective CDK inhibition**

5

6 Daniel J. Wood, Svitlana Korolchuk, Natalie J. Tatum, Lan-Zhen Wang, Jane A.

7 Endicott, Martin E.M. Noble and Mathew P. Martin

8

9 Lead contact: Martin E.M. Noble

10 Email: martin.noble@ncl.ac.uk

11

12

13 **This PDF file includes:**

14

15       Supplementary text

16       Figs. S1 to S7

17       Tables S1 to S3

18

19 **Other supplementary materials for this manuscript include the following:**

20 Table S3. Summary of data collection and structure refinement, related to Figures 3-5

21

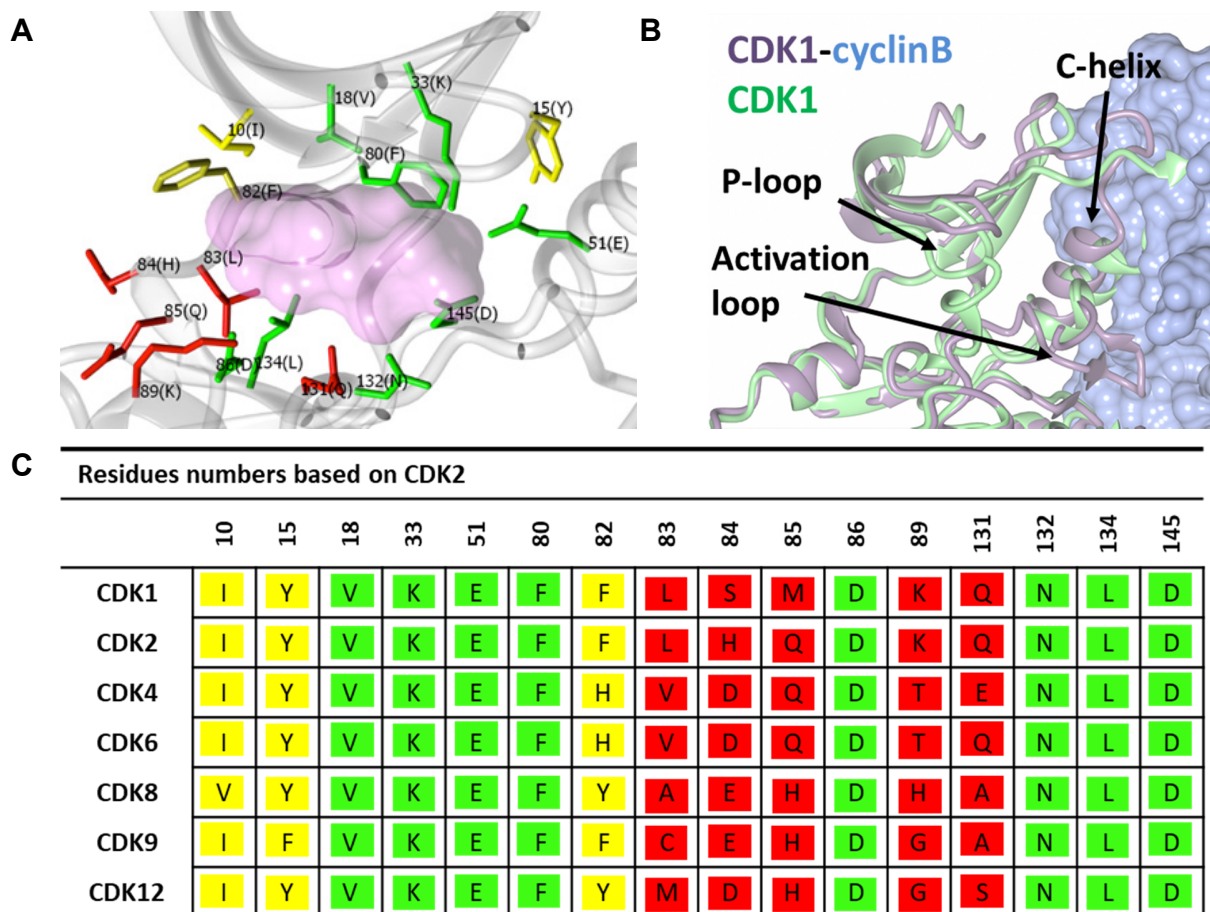

24 **Figure S1.** The conserved nature of the CDK catalytic site. Related to Figure 1. (A) The  
 25 active site of CDK2-cyclin A (PDB entry 1FIN) with key active site residues rendered as  
 26 cylinders, ATP drawn as a transparent molecular surface coloured pink. The overall fold  
 27 is drawn in white ribbon representation. The CDK2 active site residues are coloured by  
 28 conservation (green, conserved; yellow, similar, red, non-conserved) between human  
 29 CDK1, CDK2, CDK4, CDK6, CDK8, CDK9, and CDK12 (Uniprot entries P06493,  
 30 P24941, P11802, Q00534, P49336, P50750 and Q9NYV4 respectively). At the protein  
 31 sequence level, full length CDK1 and CDK2 share 64.5% sequence identity and 77.6 %  
 32 similarity (EMBOSS Needle, EMBL-EBI). (B) CDK1 in the two structures (PDB entries  
 33 4YC3 (CDK1-cyclinB-Cks2, where CDK1 is represented in lilac ribbon and cyclin B in  
 34 blue surface) and 4YC6 (CDK1-Cks1, where CDK1 is represented in green ribbon)  
 35 differ through ordering of the N-terminal lobe and activation loop upon binding of cyclin  
 2

36 B. (C) Alignment of CDKs and their active site residues depicted in A), coloured by  
37 conservation (green, conserved; yellow, similar, red, non-conserved).  
38

## A Dinaciclib

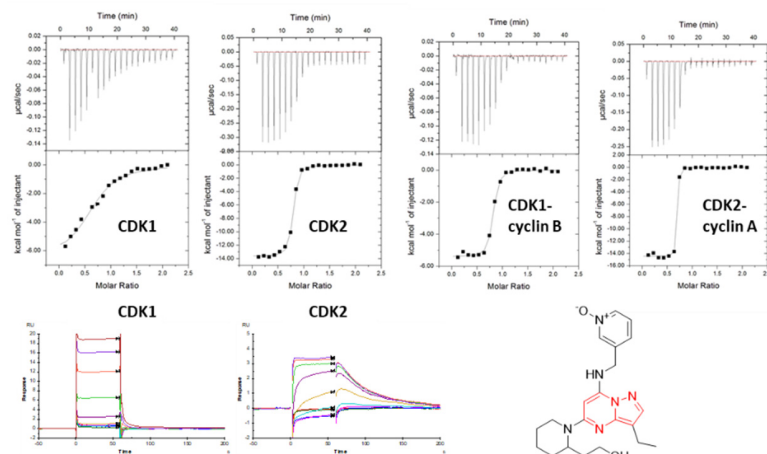

## B SU9516

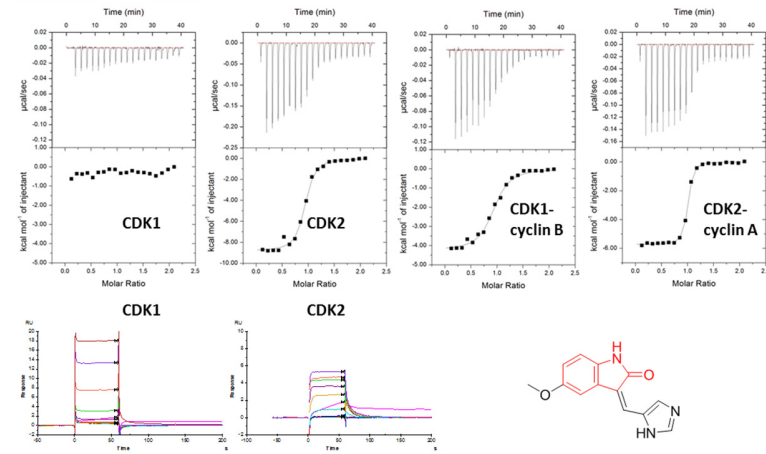

## C Alvocidib

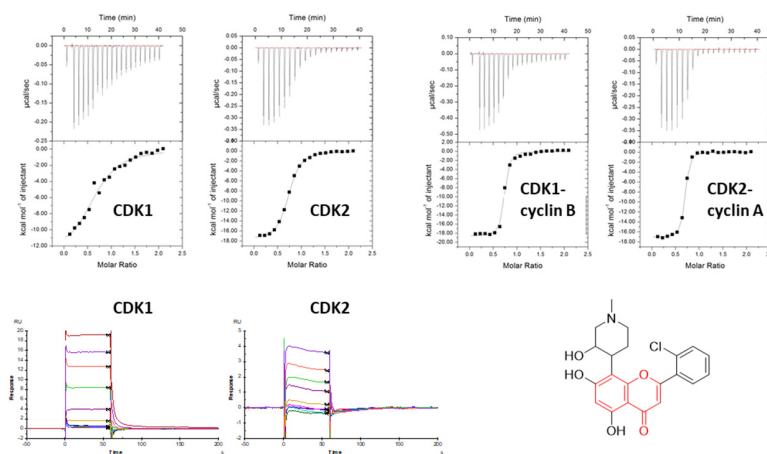

## D CGP74514A

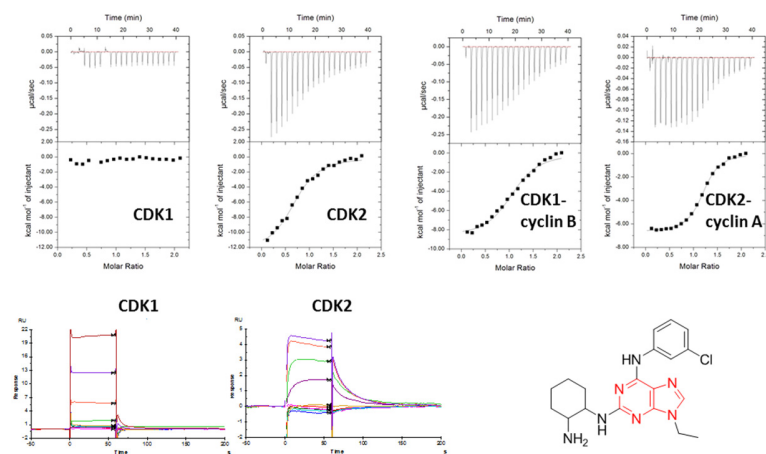

41  
42 **Figure S2.** ATP-competitive inhibitor binding to CDK1 and CDK2. Related to Table 1  
43 and Figure 2. Isothermal titration calorimetry thermograms to assess binding of  
44 inhibitors Dinaciclib (*A*), SU9516 (*B*), Alvocidib (*C*), and CGP74514A (*D*) to CDK1,  
45 CDK2, CDK1-cyclin B, and CDK2- cyclin A. The inhibitors show reduced binding to  
46 monomeric CDK1 compared to CDK1-cyclin B (**Table 1**). Surface plasmon resonance  
47 sensorgrams to assess Dinaciclib (*A*), SU9516 (*B*), Alvocidib (*C*), and CGP74514A (*D*)  
48 binding to CDK1 and CDK2. Unphosphorylated CDK1 and CDK2 as GST fusions were  
49 immobilized on the SPR chip via anti-GST antibody coupling and inhibitor binding was  
50 assayed in duplicate over 11 (GST-CDK2) or 12 (GST-CDK1) concentrations as  
51 described in the Materials and Methods. Dissociation constants (**Table S2**) were  
52 derived by using the Biacore S200 Evaluation Software (GE Healthcare).  
53

54

**A**

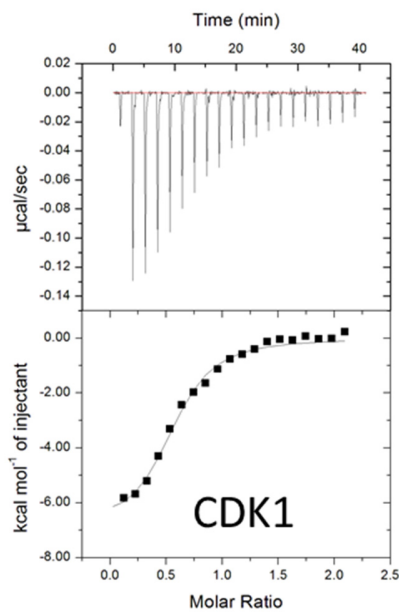

**B**

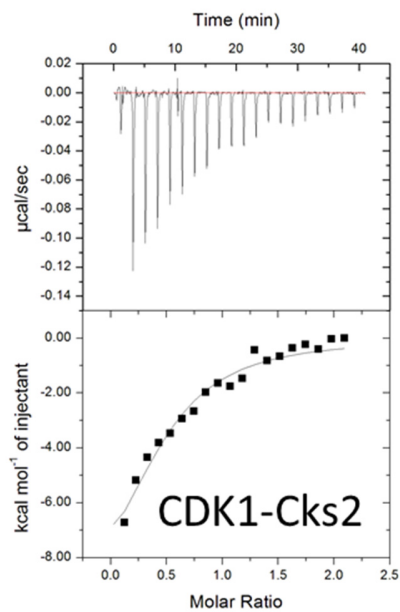

55

56 **Figure S3.** Comparison of the binding of Dinaciclib to CDK1 and CDK1-Cks2. Related  
57 to Figure 2. (A) Dinaciclib binding to CDK1. (This Figure panel is also included in Figure  
58 S1A). (B) Dinaciclib binding to CDK1-Cks2. This control was conducted in the presence  
59 of Cks2 so that any hypothesis inferred from the crystallographic observations would be  
60 supported. This titration experiment was performed as a singleton.

61

62

**A CDK1**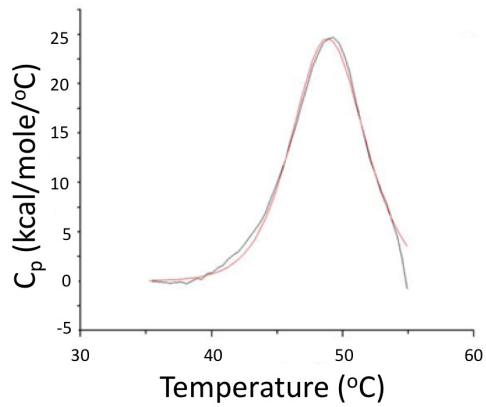**B CDK2**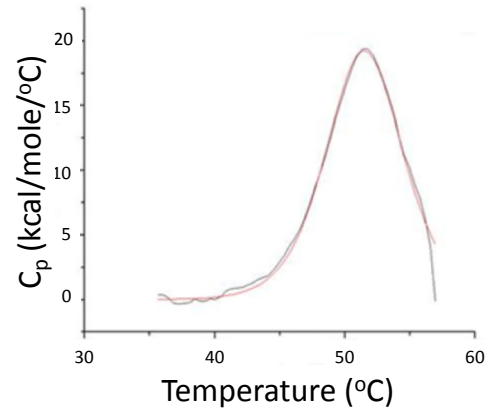**C CDK1**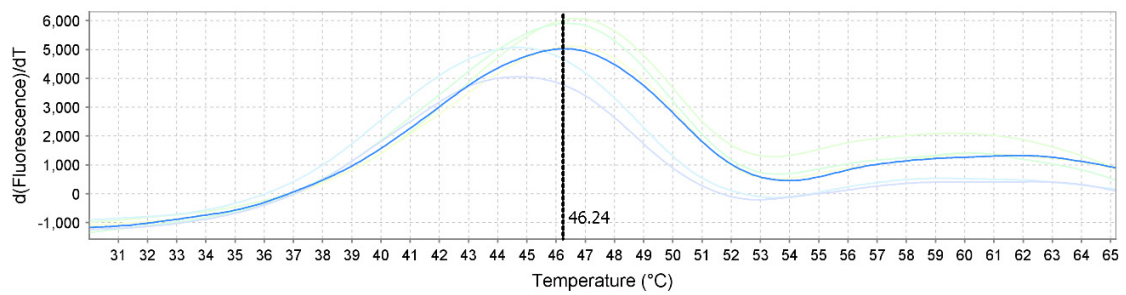**D CDK2**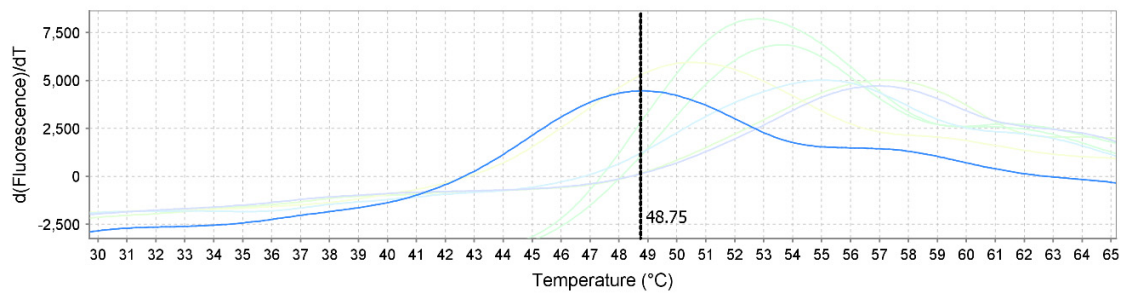

Legend

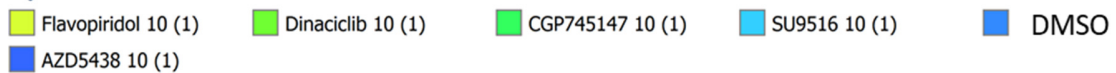

65 **Figure S4.** CDK1 and CDK2 stability assessed by differential scanning calorimetry and  
 66 differential scanning fluorimetry Related to Table 2. (A, B)  $T_m$  determination. Differential



67 scanning calorimetry was used to determine  $T_m$  values for monomeric CDK1 and CDK2.  
68 (*C, D*) Differential scanning fluorimetry shows that ATP-competitive inhibitors have little  
69 effect on the stability of CDK1 (*C*) but stabilise CDK2 (*D*). Further experimental details  
70 are provided in the Materials and Methods.  
71

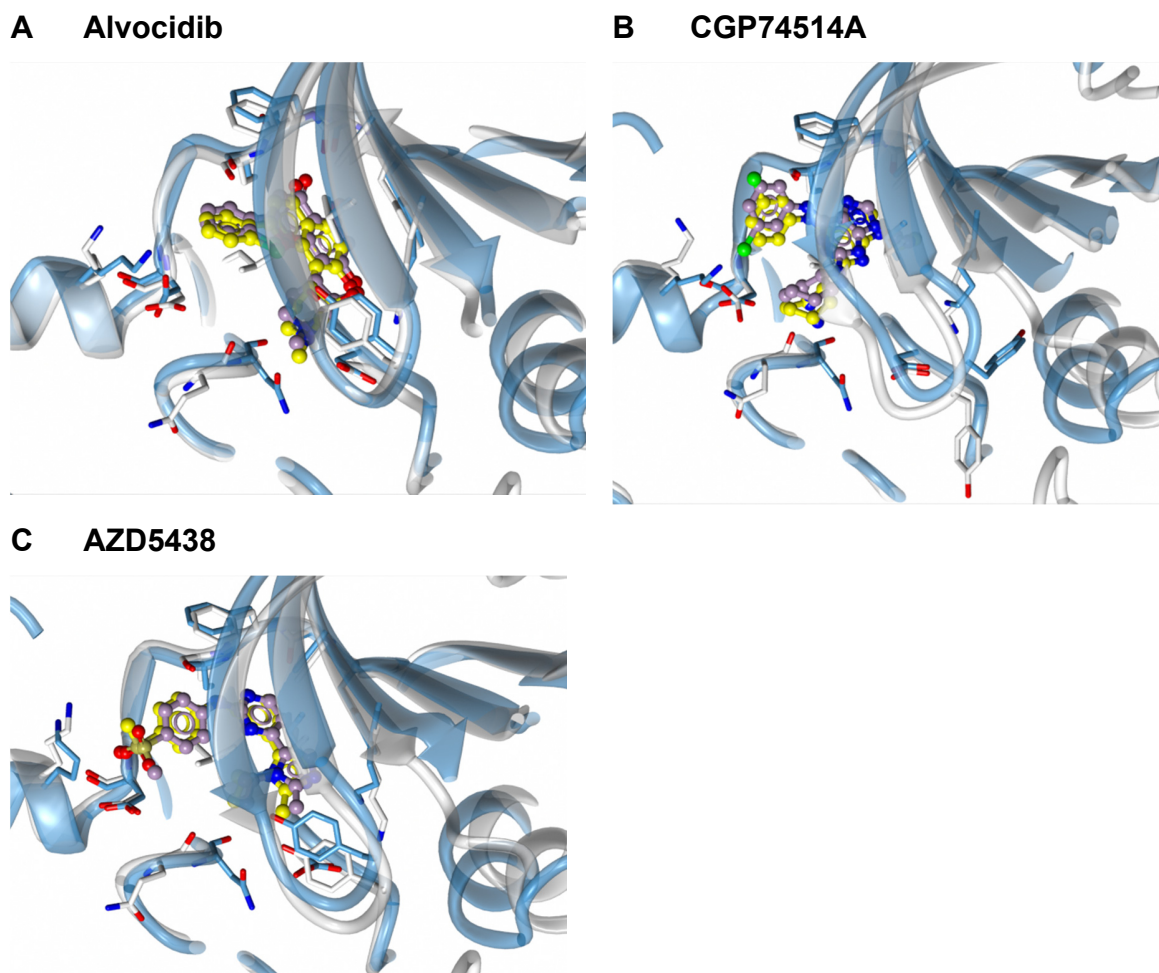

73 **Figure S5.** Comparison of ATP-competitive inhibitor binding to CDK1-cyclin B and  
74 CDK2-cyclin A. Related to Figure 3. Each of the three CDK1-cyclin B-Cks2-inhibitor co-  
75 complex structures presented in Figure 3 is overlaid with the corresponding CDK2-  
76 cyclin A-inhibitor co-complex structure. (A) Alvocidib, (B) CGP74514a and (C)  
77 AZD5438. The view in each case is identical to the view shown in Figure 3. CDK1-cyclin  
78 B is shown in white ribbon and cylinder with the inhibitor carbon atoms coloured yellow.  
79 CDK2-cyclin A is drawn in light blue with inhibitor carbon atoms coloured lilac.

80

81

**A**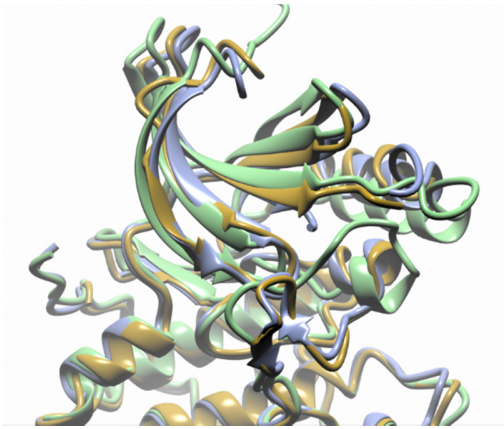**B**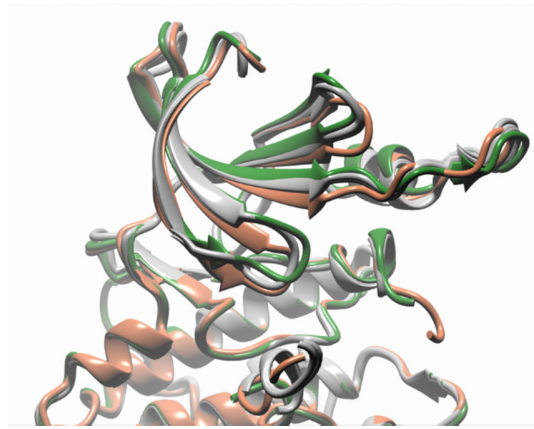

82

83 **Figure S6.** Comparison of cyclin-free CDK2 and CDK1 structural poses. Related to  
84 Figure 2-4 (A) Showing the flexibility of Cyclin-free CDK2 within the  $P2_12_12_1$  crystal  
85 form; apo CDK2 (1HCK – blue), cyclin-free CDK2 bound to ANS (3PXZ - green), and  
86 the alternative lattice formed through binding of Cks1 (1BUH – gold) suggesting that this  
87 crystal form is capable of accommodating significantly different kinase conformations.  
88 (B) Superimposition of the 4 ASU copies of cyclin-free CDK1 (4YC6 - grey) with the two  
89 alternative lattices formed through association with dinaciclib (6GU6 - coral) and  
90 AZD5438 (6GU7 - green).

91

A

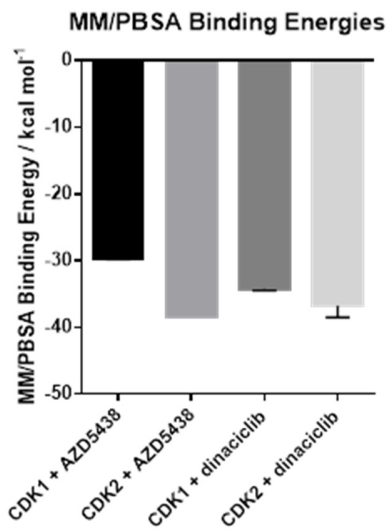

B

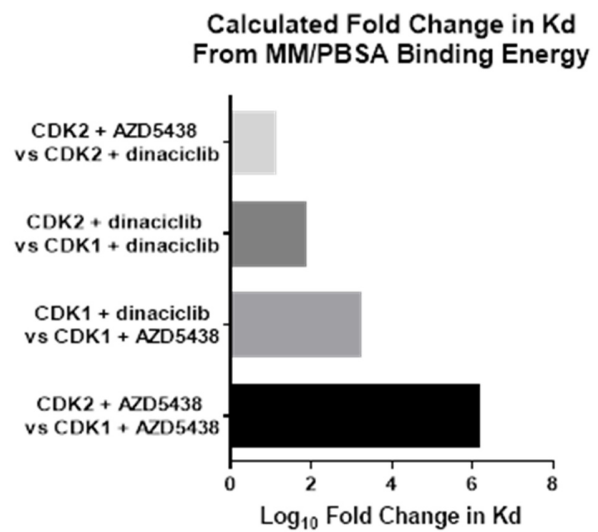

C

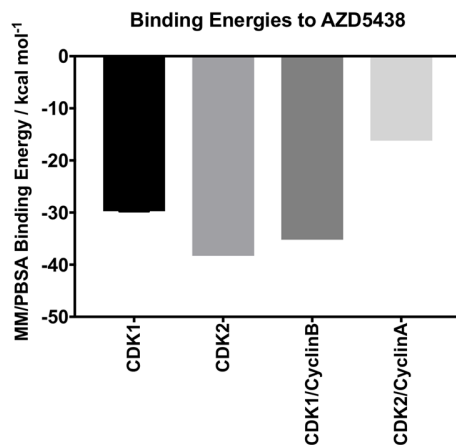

D

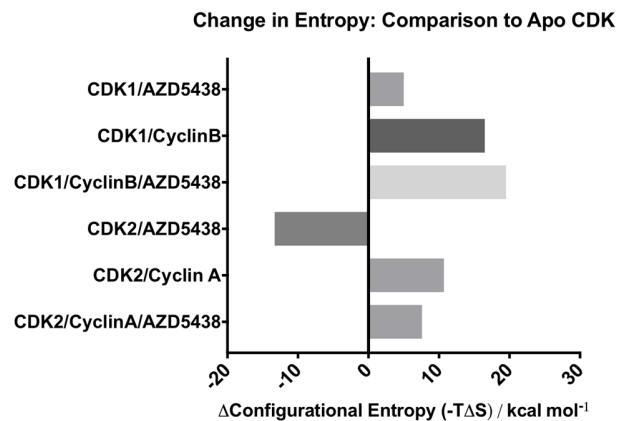

92

93 **Figure S7.** Simulations binding data for AZD5438. Related to Figure 2. In silico molecular  
 94 dynamics simulations and MM/PBSA calculations against cyclin-free CDK1 and CDK2  
 95 with AZD5438 and Dinaciclib (A) and calculated fold change in Kd (B). Simulation analysis  
 96 for monomeric and complex binding to AZD5438: binding energies derived from  
 97 molecular dynamics simulations (C), and calculated change in configurational entropy in  
 98 the CDK component of protein, ligand, and protein-ligand complexes (D).

99

100 SUPPLEMENTAL TABLES

101

|            | Published measurements<br>(nM) |                           | Lab measurements<br>(nM) |              | Method                                                                                                                 | Reference                                                                                                                                       |
|------------|--------------------------------|---------------------------|--------------------------|--------------|------------------------------------------------------------------------------------------------------------------------|-------------------------------------------------------------------------------------------------------------------------------------------------|
|            | CDK1B                          | CDK2A                     | CDK1B                    | CDK2A        |                                                                                                                        |                                                                                                                                                 |
| Dinaciclib | 3/3/3/3                        | 1/1/1/1                   | 23 (12.8)                | 3.5<br>(1.9) | $\gamma^{33}\text{P-ATP}$<br>streptavidin<br>coated bead-<br>based assay<br>(biotinylated<br>peptide of<br>Histone H1) | (Whittaker et al.,<br>2017), (Asghar<br>et al., 2015),<br>(Mariaule and<br>Belmont, 2014),<br>(Parry et al.,<br>2010)                           |
| AZD5438    | 16/16                          | 3/45                      | 12 (6.7)                 | 7.4<br>(4.1) | Scintillation<br>proximity<br>assay                                                                                    | (Whittaker et al.,<br>2017), (Byth et<br>al., 2009)                                                                                             |
| Alvocidib  | 27/30/27/<br>30/30             | 405/170/40<br>5/100<br>70 | 8.8 (4.9)                | 26<br>(14.4) | Radiolabelled<br>$\gamma^{33}\text{P-ATP}$<br>kinase assay                                                             | (Whittaker et<br>al.,<br>2017),(Asghar<br>et al.,<br>2015),(Byth et<br>al., 2009),<br>(Mariaule and<br>Belmont, 2014),<br>(Kim et al.,<br>2000) |
| CGP74514A  | 25/25                          | n/a                       | 833 (463)                | 33<br>(18.3) | Radiolabelled<br>$\gamma^{33}\text{P-ATP}$<br>kinase assay                                                             | (Imbach et al.,<br>1999)                                                                                                                        |
| SU9516     | 40/40                          | 22/22                     | 186 (103)                | 38 (21)      | Radiolabelled<br>$\gamma^{33}\text{P-ATP}$<br>kinase assay                                                             | (Lane et al.,<br>2001)                                                                                                                          |

102

103 **Table S1.** Inhibitor IC<sub>50</sub> values. Related to Figure 2. IC<sub>50</sub> values for each of the five  
104 inhibitors against CDK1-cyclin B and CDK2-cyclin A were determined using an  
105 ADPGlo™ assay format (Brown et al., 2015) and compared to literature values. K<sub>i</sub>  
106 values denoted in parenthesis

107

## A

|                          | AZD5438 vs CDK1-cyclin B                | AZD5438 vs CDK2-cyclin A                | AZD5438 vs CDK1                         | AZD5438 vs CDK2                         |
|--------------------------|-----------------------------------------|-----------------------------------------|-----------------------------------------|-----------------------------------------|
| N (sites)                | 0.58                                    | 0.68                                    | 0.65                                    | 0.70                                    |
| $K_a$ ( $M^{-1}$ )       | $1.76 \times 10^7 \pm 1.83 \times 10^6$ | $3.95 \times 10^8 \pm 1.38 \times 10^8$ | $8.42 \times 10^5 \pm 1.54 \times 10^5$ | $3.38 \times 10^7 \pm 4.01 \times 10^6$ |
| $K_d$ (nM)               | 57.0 ± 5.9                              | 2.50 ± 0.88                             | 1200 ± 220                              | 29.5 ± 3.5                              |
| $\Delta H$ (kcal/mol)    | -12.80 ± 0.11                           | -13.40 ± 0.06                           | -6.44 ± 0.38                            | -16.20 ± 0.11                           |
| $\Delta S$ (cal/mol/deg) | -9.1                                    | -4.7                                    | 5.9                                     | -19.1                                   |

|                          | CGP74514A vs CDK1-cyclin B              | CGP74514A vs CDK2-cyclin A              | CGP74514A vs CDK1 | CGP74514A vs CDK2                       |
|--------------------------|-----------------------------------------|-----------------------------------------|-------------------|-----------------------------------------|
| N (sites)                | 1.01                                    | 1.01                                    | No fitting        | 1.17                                    |
| $K_a$ ( $M^{-1}$ )       | $1.11 \times 10^6 \pm 3.09 \times 10^5$ | $4.74 \times 10^6 \pm 4.69 \times 10^5$ |                   | $1.43 \times 10^6 \pm 2.72 \times 10^5$ |
| $K_d$ (nM)               | 900 ± 250                               | 210 ± 21                                | >20000            | 700 ± 130                               |
| $\Delta H$ (kcal/mol)    | -6.09 ± 0.34                            | -6.09 ± 0.07                            |                   | -4.60 ± 0.14                            |
| $\Delta S$ (cal/mol/deg) | 7.6                                     | 10.5                                    |                   | 13.0                                    |

|                          | Dinaciclib vs CDK1-cyclin B            | Dinaciclib vs CDK2-cyclin A             | Dinaciclib vs CDK1                      | Dinaciclib vs CDK2                      |
|--------------------------|----------------------------------------|-----------------------------------------|-----------------------------------------|-----------------------------------------|
| N (sites)                | 0.71                                   | 0.70                                    | 0.57                                    | 0.82                                    |
| $K_a$ ( $M^{-1}$ )       | $3.4 \times 10^7 \pm 5.64 \times 10^6$ | $3.19 \times 10^8 \pm 1.55 \times 10^8$ | $1.41 \times 10^6 \pm 2.34 \times 10^5$ | $1.82 \times 10^7 \pm 3.95 \times 10^6$ |
| $K_d$ (nM)               | 29.4 ± 4.9                             | 3.1 ± 1.5                               | 709 ± 120                               | 55 ± 12                                 |
| $\Delta H$ (kcal/mol)    | -7.10 ± 0.07                           | -12.40 ± 0.08                           | -6.9 ± 0.3                              | -13.30 ± 0.21                           |
| $\Delta S$ (cal/mol/deg) | 11.0                                   | -2.1                                    | 5.3                                     | -10.8                                   |

|                          | SU9516 vs CDK1-cyclin B                 | SU9516 vs CDK2-cyclin A                 | SU9516 vs CDK1 | SU9516 vs CDK2                          |
|--------------------------|-----------------------------------------|-----------------------------------------|----------------|-----------------------------------------|
| N (sites)                | 0.97                                    | 0.98                                    | No fitting     | 0.95                                    |
| $K_a$ ( $M^{-1}$ )       | $4.68 \times 10^6 \pm 4.11 \times 10^5$ | $3.28 \times 10^7 \pm 3.06 \times 10^6$ |                | $1.02 \times 10^7 \pm 1.57 \times 10^6$ |
| $K_d$ (nM)               | 214 ± 19                                | 30.5 ± 2.8                              | >20000         | 98 ± 15                                 |
| $\Delta H$ (kcal/mol)    | -4.39 ± 0.04                            | -5.02 ± 0.03                            |                | -6.28 ± 0.08                            |
| $\Delta S$ (cal/mol/deg) | 16.0                                    | 17.8                                    |                | 11.4                                    |

|                          | Alvocidib vs CDK1-cyclin B             | Alvocidib vs CDK2-cyclin A              | Alvocidib vs CDK1                       | Alvocidib vs CDK2                      |
|--------------------------|----------------------------------------|-----------------------------------------|-----------------------------------------|----------------------------------------|
| N (sites)                | 0.71                                   | 0.80                                    | 0.61                                    | 0.82                                   |
| $K_a$ ( $M^{-1}$ )       | $4.51 \times 10^7 \pm 8.5 \times 10^6$ | $5.08 \times 10^7 \pm 1.04 \times 10^7$ | $5.15 \times 10^5 \pm 7.89 \times 10^4$ | $4.6 \times 10^6 \pm 5.01 \times 10^5$ |
| $K_d$ (nM)               | 22.2 ± 4.2                             | 20 ± 4                                  | 1900 ± 300                              | 217.0 ± 23.7                           |
| $\Delta H$ (kcal/mol)    | -16.60 ± 0.16                          | -15.10 ± 0.14                           | -10.70 ± 0.74                           | -13.80 ± 0.18                          |
| $\Delta S$ (cal/mol/deg) | -19.8                                  | -14.5                                   | -9.3                                    | -14.9                                  |

## B

|                          | AZD5438 vs CDK1-cyclin B                | AZD5438 vs CDK2-cyclin A                | AZD5438 vs CDK1                         | AZD5438 vs CDK2                         |
|--------------------------|-----------------------------------------|-----------------------------------------|-----------------------------------------|-----------------------------------------|
| N (sites)                | 0.58                                    | 0.56                                    | 0.65                                    | 0.56                                    |
| $K_a$ ( $M^{-1}$ )       | $1.20 \times 10^7 \pm 3.77 \times 10^6$ | $2.22 \times 10^8 \pm 4.73 \times 10^7$ | $1.32 \times 10^5 \pm 2.53 \times 10^4$ | $4.28 \times 10^7 \pm 3.71 \times 10^6$ |
| $K_d$ (nM)               | 83 ± 26                                 | 4.5 ± 1.0                               | 7600 ± 1500                             | 23 ± 2                                  |
| $\Delta H$ (kcal/mol)    | -14.13 ± 0.42                           | -16 ± 0.08                              | -18.8 ± 3.9                             | -19.9 ± 0.1                             |
| $\Delta S$ (cal/mol/deg) | -14.2                                   | -14.6                                   | -38.5                                   | -30.7                                   |

|                          | CGP74514A vs CDK1-cyclin B              | CGP74514A vs CDK2-cyclin A              | CGP74514A vs CDK1 | CGP74514A vs CDK2                       |
|--------------------------|-----------------------------------------|-----------------------------------------|-------------------|-----------------------------------------|
| N (sites)                | 0.73                                    | 1.18                                    | No fitting        | 1.09                                    |
| $K_a$ ( $M^{-1}$ )       | $9.82 \times 10^5 \pm 1.31 \times 10^5$ | $4.21 \times 10^6 \pm 3.34 \times 10^5$ |                   | $1.37 \times 10^6 \pm 2.27 \times 10^5$ |
| $K_d$ (nM)               | 1000 ± 140                              | 240 ± 19                                | >20000            | 730 ± 120                               |
| $\Delta H$ (kcal/mol)    | -12.6 ± 0.5                             | -6.70 ± 0.06                            |                   | -8.73 ± 0.25                            |
| $\Delta S$ (cal/mol/deg) | -14.1                                   | 8.2                                     |                   | -0.7                                    |

|                          | Dinaciclib vs CDK1-cyclin B             | Dinaciclib vs CDK2-cyclin A             | Dinaciclib vs CDK1                      | Dinaciclib vs CDK2                      |
|--------------------------|-----------------------------------------|-----------------------------------------|-----------------------------------------|-----------------------------------------|
| N (sites)                | 0.77                                    | 0.65                                    | 0.67                                    | 0.75                                    |
| $K_a$ ( $M^{-1}$ )       | $2.93 \times 10^7 \pm 4.71 \times 10^6$ | $9.93 \times 10^6 \pm 3.73 \times 10^6$ | $8.44 \times 10^5 \pm 1.68 \times 10^5$ | $3.73 \times 10^7 \pm 3.74 \times 10^6$ |
| $K_d$ (nM)               | 34.0 ± 5.5                              | 1.0 ± 0.4                               | 1200 ± 240                              | 27 ± 3                                  |
| $\Delta H$ (kcal/mol)    | -5.40 ± 0.05                            | -14.40 ± 0.09                           | -6.56 ± 0.39                            | -13.70 ± 0.08                           |
| $\Delta S$ (cal/mol/deg) | 16.4                                    | -6.43                                   | 5.5                                     | -10.4                                   |

|                          | SU9516 vs CDK1-cyclin B                 | SU9516 vs CDK2-cyclin A                | SU9516 vs CDK1 | SU9516 vs CDK2                          |
|--------------------------|-----------------------------------------|----------------------------------------|----------------|-----------------------------------------|
| N (sites)                | 0.91                                    | 0.96                                   | No fitting     | 0.90                                    |
| $K_a$ ( $M^{-1}$ )       | $3.94 \times 10^6 \pm 5.53 \times 10^5$ | $4.88 \times 10^7 \pm 4.1 \times 10^6$ |                | $1.02 \times 10^7 \pm 1.77 \times 10^6$ |
| $K_d$ (nM)               | 254 ± 36                                | 21.0 ± 1.7                             | >20000         | 98 ± 17                                 |
| $\Delta H$ (kcal/mol)    | -4.24 ± 0.07                            | -5.72 ± 0.02                           |                | -8.81 ± 0.13                            |
| $\Delta S$ (cal/mol/deg) | 16.2                                    | 16.3                                   |                | 3.0                                     |

|                          | Alvocidib vs CDK1-cyclin B             | Alvocidib vs CDK2-cyclin A          | Alvocidib vs CDK1                       | Alvocidib vs CDK2                       |
|--------------------------|----------------------------------------|-------------------------------------|-----------------------------------------|-----------------------------------------|
| N (sites)                | 0.69                                   | 0.65                                | 0.68                                    | 0.70                                    |
| $K_a$ ( $M^{-1}$ )       | $3.01 \times 10^7 \pm 6.5 \times 10^6$ | $4 \times 10^7 \pm 3.1 \times 10^6$ | $7.44 \times 10^5 \pm 1.92 \times 10^5$ | $4.63 \times 10^6 \pm 2.08 \times 10^5$ |
| $K_d$ (nM)               | 33.0 ± 7.2                             | 25 ± 2                              | 1300 ± 350                              | 220.0 ± 9.7                             |
| $\Delta H$ (kcal/mol)    | -18.60 ± 0.24                          | -17.10 ± 0.08                       | -13.2 ± 1.1                             | -17.8 ± 0.1                             |
| $\Delta S$ (cal/mol/deg) | -27.3                                  | -21.5                               | -16.6                                   | -28.2                                   |

111

112 **Table S2.** ITC experimental data for inhibitor binding to cyclin-free CDK1, CDK2 and  
113 their respective complexes with cognate cyclin partners. Related to Figure 2.

114 Experiments were carried out in duplicate biological replicates shown in panels A and B.

115



116 **Table S3.** Summary of data collection and structure refinement. related to Figures 3-5

117

118 See associated Excel file: 'TableS3CrystallographyData.xlsx'

119

120
